# Supplementary material for: Structure-Activity Relationships of the Imidazolium Compounds as Antibacterials of Staphylococcus aureus and Pseudomonas aeruginosa
Source: MDPI journal article supplement (doi:10.3390/ijms22157997), 2021-07-27
Supplement: s1 [file s1]

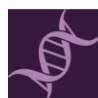

# Structure–Activity Relationships of the Imidazolium Compounds as Antibacterials of *Staphylococcus aureus* and *Pseudomonas aeruginosa*

Łukasz Pałkowski <sup>1\*</sup>, Maciej Karolak <sup>1</sup>, Jerzy Błaszczyński <sup>2</sup>, Jerzy Krysiński <sup>1</sup> and Roman Słowiński <sup>2,3</sup>

Table 1. Information system.

| Object | n | R  | log-<br>CMC | gC<br>MC | G        | A  | Gad<br>s | ML<br>OGP | Bala-<br>ban<br>index | Narumi<br>topolog-<br>ical in-<br>dex | MW         | HOM<br>O     | LUM<br>O     | HOM<br>O-LU<br>MO<br>gap | di-<br>pole<br>of Gy-<br>ration | total<br>structure<br>connec-<br>tivity in-<br>dex | Wie-<br>ner<br>index | SAU   | PAE                   |
|--------|---|----|-------------|----------|----------|----|----------|-----------|-----------------------|---------------------------------------|------------|--------------|--------------|--------------------------|---------------------------------|----------------------------------------------------|----------------------|-------|-----------------------|
| 1      | 2 | 1  | 2,15        | 61,9     | 2,7<br>5 | 52 | 20,2     | 0,175     | 1,397                 | 12,712                                | 252,<br>36 | -0,38<br>777 | -0,19<br>852 | -0,189<br>25             | 1,64<br>6                       | 4,908                                              | 0,28                 | 5,275 | 30,95933,875<br>75 00 |
| 2      | 2 | 2  | 2,23        | 60,1     | 2,7<br>1 | 54 | 20,8     | 0,711     | 1,407                 | 14,099                                | 280,<br>42 | -0,38<br>416 | -0,19<br>108 | -0,193<br>08             | 0,10<br>3                       | 5,294                                              | 0,266                | 5,768 | 28,46728,468<br>97 00 |
| 3      | 2 | 3  | 2,38        | 59,8     | 2,6<br>9 | 56 | 21,3     | 1,216     | 1,405                 | 15,485                                | 308,<br>48 | -0,38<br>269 | -0,18<br>871 | -0,193<br>98             | 2,31<br>4                       | 5,804                                              | 0,254                | 6,307 | 13,18113,181<br>31 00 |
| 4      | 2 | 4  | 2,41        | 57,4     | 2,6<br>5 | 58 | 21,7     | 1,697     | 1,397                 | 16,871                                | 336,<br>54 | -0,38<br>194 | -0,18<br>751 | -0,194<br>43             | 5,47<br>4                       | 6,246                                              | 0,243                | 6,877 | 6,142513,180<br>1 00  |
| 5      | 2 | 5  | 2,49        | 55,5     | 2,6<br>1 | 60 | 22,3     | 2,157     | 1,386                 | 18,257                                | 364,<br>6  | -0,38<br>150 | -0,18<br>679 | -0,194<br>71             | 8,62<br>8                       | 6,777                                              | 0,234                | 7,468 | 5,741411,483<br>4 00  |
| 6      | 2 | 6  | 2,58        | 53,4     | 2,5<br>7 | 62 | 22,7     | 2,599     | 1,373                 | 19,644                                | 392,<br>66 | -0,38<br>544 | -0,18<br>641 | -0,199<br>03             | 12,5<br>01                      | 7,25                                               | 0,226                | 8,074 | 1,337610,788<br>9 00  |
| 7      | 2 | 7  | 2,65        | 51,2     | 2,5<br>3 | 64 | 23,5     | 3,025     | 1,359                 | 21,03                                 | 420,<br>72 | -0,38<br>109 | -0,18<br>618 | -0,194<br>91             | 16,2<br>01                      | 7,791                                              | 0,218                | 8,692 | 0,16275,0860<br>5 0   |
| 8      | 2 | 8  | 2,72        | 48,9     | 2,4<br>9 | 66 | 23,9     | 4,349     | 1,346                 | 22,416                                | 448,<br>78 | -0,36<br>560 | -0,18<br>605 | -0,179<br>55             | 20,4<br>72                      | 8,282                                              | 0,211                | 9,319 | 0,03841,1930<br>9 0   |
| 9      | 2 | 9  | 2,81        | 47,5     | 2,4<br>5 | 68 | 24,3     | 4,748     | 1,333                 | 23,803                                | 476,<br>84 | -0,35<br>218 | -0,18<br>590 | -0,166<br>28             | 24,4<br>99                      | 8,831                                              | 0,205                | 9,952 | 0,01821,1320<br>6 0   |
| 10     | 2 | 10 | 2,92        | 45,3     | 2,4<br>1 | 70 | 24,8     | 5,136     | 1,32                  | 25,189                                | 504,<br>9  | -0,34<br>105 | -0,18<br>584 | -0,155<br>21             | 29,0<br>11                      | 9,333                                              | 0,199                | 10,59 | 0,01730,5380<br>7 0   |
| 11     | 2 | 11 | 3,04        | 42,5     | 2,3<br>7 | 72 | 25,6     | 5,514     | 1,308                 | 26,575                                | 532,<br>96 | -0,33<br>153 | -0,18<br>577 | -0,145<br>76             | 33,2<br>58                      | 9,883                                              | 0,194                | 11,23 | 0,01650,5130<br>3 6 0 |
| 12     | 2 | 12 | 3,15        | 41,4     | 2,3<br>3 | 74 | 26,3     | 5,883     | 1,297                 | 27,961                                | 561,<br>02 | -0,32<br>343 | -0,18<br>573 | -0,137<br>70             | 37,9<br>35                      | 10,392                                             | 0,189                | 11,87 | 0,03160,4910<br>9 6 0 |
| 13     | 2 | 14 | 3,34        | 37,5     | 2,2<br>5 | 78 | 27,5     | 6,595     | 1,277                 | 30,734                                | 617,<br>14 | -0,31<br>025 | -0,18<br>566 | -0,124<br>59             | 47,1<br>38                      | 11,454                                             | 0,18                 | 13,18 | 0,05811,8170<br>5 0   |
| 14     | 2 | 16 | 3,52        | 33,9     | 2,1<br>7 | 82 | 28,8     | 7,278     | 1,26                  | 33,507                                | 673,<br>26 | -0,30<br>006 | -0,18<br>563 | -0,114<br>43             | 56,5<br>53                      | 12,515                                             | 0,173                | 14,48 | 0,10751,6800<br>8 3 0 |
| 15     | 3 | 1  | 2,18        | 60,8     | 2,7<br>4 | 54 | 20,5     | 0,447     | 1,363                 | 13,405                                | 266,<br>39 | -0,37<br>891 | -0,19<br>219 | -0,186<br>72             | 1,94<br>1                       | 5,192                                              | 0,273                | 5,649 | 29,65229,652<br>03 00 |
| 16     | 3 | 2  | 2,26        | 58,9     | 2,7      | 56 | 21,1     | 0,967     | 1,374                 | 14,792                                | 294,<br>45 | -0,37<br>602 | -0,18<br>624 | -0,189<br>78             | 2,07<br>6                       | 5,608                                              | 0,26                 | 6,143 | 27,37427,375<br>84 00 |
| 17     | 3 | 3  | 2,32        | 57,8     | 2,6<br>6 | 58 | 21,6     | 1,46      | 1,375                 | 16,178                                | 322,<br>51 | -0,37<br>432 | -0,18<br>443 | -0,189<br>89             | 2,42<br>6                       | 6,115                                              | 0,249                | 6,68  | 25,42225,423<br>52 00 |
| 18     | 3 | 4  | 2,44        | 56,3     | 2,6<br>2 | 60 | 22       | 1,929     | 1,37                  | 17,564                                | 350,<br>57 | -0,37<br>438 | -0,18<br>333 | -0,191<br>05             | 3,43<br>7                       | 6,617                                              | 0,239                | 7,247 | 5,93255,9330<br>4 0   |
| 19     | 3 | 5  | 2,52        | 54,4     | 2,5<br>8 | 62 | 22,6     | 2,38      | 1,362                 | 18,951                                | 378,<br>63 | -0,37<br>327 | -0,18<br>255 | -0,190<br>72             | 4,78<br>2                       | 7,183                                              | 0,23                 | 7,835 | 5,562222,249<br>6 00  |

|    |   |    |      |      |         |    |      |       |       |        |        |       |       |        |      |        |       |       |              |
|----|---|----|------|------|---------|----|------|-------|-------|--------|--------|-------|-------|--------|------|--------|-------|-------|--------------|
| 20 | 3 | 6  | 2,61 | 52,3 | $2,5_4$ | 64 | 23   | 2,814 | 1,351 | 20,337 | 406,69 | -0,37 | -0,18 | -0,190 | 6,85 | 7,726  | 0,222 | 8,438 | 1,298410,471 |
|    |   |    |      |      |         |    |      |       |       |        |        | 302   | 221   | 81     | 0    |        |       |       | 0 00         |
| 21 | 3 | 7  | 2,68 | 50,1 | $2,5_9$ | 66 | 23,8 | 3,232 | 1,34  | 21,723 | 434,75 | -0,37 | -0,18 | -0,191 | 9,52 | 8,348  | 0,215 | 9,054 | 0,15824,9450 |
|    |   |    |      |      |         |    |      |       |       |        |        | 321   | 137   | 84     | 5    |        |       |       | 4 0          |
| 22 | 3 | 8  | 2,75 | 47,9 | $2,4_6$ | 68 | 24,2 | 4,55  | 1,329 | 23,109 | 462,81 | -0,36 | -0,18 | -0,179 | 12,3 | 8,912  | 0,208 | 9,678 | 0,00931,1620 |
|    |   |    |      |      |         |    |      |       |       |        |        | 030   | 122   | 08     | 79   |        |       |       | 7 0          |
| 23 | 3 | 9  | 2,84 | 46,4 | $2,4_2$ | 70 | 24,6 | 4,944 | 1,318 | 24,496 | 490,87 | -0,34 | -0,18 | -0,166 | 14,8 | 9,513  | 0,202 | 10,30 | 0,06944,4510 |
|    |   |    |      |      |         |    |      |       |       |        |        | 773   | 113   | 60     | 85   |        |       |       | 9 4 0        |
| 24 | 3 | 10 | 2,95 | 44,2 | $2,3_8$ | 72 | 25,1 | 5,327 | 1,307 | 25,882 | 518,93 | -0,33 | -0,18 | -0,155 | 17,8 | 10,09  | 0,197 | 10,94 | 0,00840,5260 |
|    |   |    |      |      |         |    |      |       |       |        |        | 649   | 116   | 33     | 74   |        |       |       | 6 8 0        |
| 25 | 3 | 11 | 3,07 | 42,4 | $2,3_4$ | 74 | 25,9 | 5,7   | 1,297 | 27,268 | 546,99 | -0,32 | -0,18 | -0,146 | 22,8 | 10,668 | 0,192 | 11,58 | 0,01610,5020 |
|    |   |    |      |      |         |    |      |       |       |        |        | 734   | 055   | 79     | 54   |        |       |       | 7 9 0        |
| 26 | 3 | 12 | 3,18 | 40,3 | $2,3$   | 76 | 22,6 | 6,064 | 1,287 | 28,655 | 575,05 | -0,31 | -0,18 | -0,138 | 26,4 | 11,24  | 0,187 | 12,23 | 0,007715,484 |
|    |   |    |      |      |         |    |      |       |       |        |        | 947   | 057   | 90     | 50   |        |       |       | 2 4 00       |
| 27 | 3 | 14 | 3,37 | 36,4 | $2,2_2$ | 80 | 27,7 | 6,769 | 1,269 | 31,427 | 631,17 | -0,30 | -0,18 | -0,125 | 24,4 | 12,739 | 0,178 | 13,52 | 0,05557,1230 |
|    |   |    |      |      |         |    |      |       |       |        |        | 693   | 170   | 23     | 31   |        |       |       | 9 6 0        |
| 28 | 3 | 16 | 3,55 | 32,8 | $2,1_4$ | 84 | 29,1 | 7,445 | 1,252 | 34,2   | 687,29 | -0,29 | -0,18 | -0,115 | 19,2 | 14,623 | 0,171 | 14,83 | 0,105513,192 |
|    |   |    |      |      |         |    |      |       |       |        |        | 728   | 211   | 17     | 58   |        |       |       | 5 4 00       |
| 29 | 4 | 1  | 2,22 | 59,6 | $2,7_1$ | 56 | 20,9 | 0,711 | 1,334 | 14,099 | 280,42 | -0,36 | -0,18 | -0,179 | 1,56 | 5,744  | 0,266 | 6,021 | 28,46728,468 |
|    |   |    |      |      |         |    |      |       |       |        |        | 306   | 370   | 36     | 8    |        |       |       | 97 00        |
| 30 | 4 | 2  | 2,3  | 57,7 | $2,6_7$ | 58 | 21,4 | 1,216 | 1,346 | 15,485 | 308,48 | -0,35 | -0,17 | -0,183 | 0,10 | 6,137  | 0,254 | 6,515 | 6,590626,363 |
|    |   |    |      |      |         |    |      |       |       |        |        | 990   | 667   | 23     | 0    |        |       |       | 5 00         |
| 31 | 4 | 3  | 2,39 | 56,6 | $2,6_3$ | 60 | 21,9 | 1,697 | 1,349 | 16,871 | 336,54 | -0,35 | -0,17 | -0,184 | 1,93 | 6,639  | 0,243 | 7,051 | 12,28526,360 |
|    |   |    |      |      |         |    |      |       |       |        |        | 870   | 437   | 33     | 4    |        |       |       | 01 00        |
| 32 | 4 | 4  | 2,45 | 55,1 | $2,5_9$ | 62 | 22,3 | 2,157 | 1,346 | 18,257 | 364,6  | -0,35 | -0,17 | -0,184 | 4,87 | 7,075  | 0,234 | 7,615 | 0,711911,483 |
|    |   |    |      |      |         |    |      |       |       |        |        | 806   | 325   | 81     | 5    |        |       |       | 4 00         |
| 33 | 4 | 5  | 2,53 | 53,2 | $2,5_5$ | 64 | 22,9 | 2,599 | 1,34  | 19,644 | 392,66 | -0,35 | -0,17 | -0,185 | 7,84 | 7,597  | 0,226 | 8,201 | 0,345210,788 |
|    |   |    |      |      |         |    |      |       |       |        |        | 770   | 257   | 13     | 9    |        |       |       | 1 00         |
| 34 | 4 | 6  | 2,64 | 51,1 | $2,5_1$ | 66 | 23,3 | 3,025 | 1,332 | 21,03  | 420,72 | -0,35 | -0,17 | -0,185 | 11,5 | 8,063  | 0,218 | 8,802 | 0,07935,0860 |
|    |   |    |      |      |         |    |      |       |       |        |        | 747   | 227   | 20     | 27   |        |       |       | 4 0          |
| 35 | 4 | 7  | 2,71 | 48,9 | $2,4_7$ | 68 | 23,9 | 3,437 | 1,323 | 22,416 | 448,78 | -0,35 | -0,17 | -0,184 | 12,0 | 8,72   | 0,211 | 9,415 | 0,00961,1930 |
|    |   |    |      |      |         |    |      |       |       |        |        | 989   | 502   | 87     | 89   |        |       |       | 2 0          |
| 36 | 4 | 8  | 2,79 | 46,7 | $2,4_3$ | 70 | 24,5 | 4,748 | 1,314 | 23,803 | 476,84 | -0,35 | -0,17 | -0,183 | 15,4 | 9,261  | 0,205 | 10,03 | 0,00912,2830 |
|    |   |    |      |      |         |    |      |       |       |        |        | 824   | 488   | 36     | 85   |        |       |       | 7 3 0        |
| 37 | 4 | 9  | 2,88 | 45,2 | $2,3_9$ | 72 | 24,9 | 5,136 | 1,304 | 25,189 | 504,9  | -0,34 | -0,17 | -0,170 | 18,7 | 9,836  | 0,199 | 10,66 | 0,00860,2780 |
|    |   |    |      |      |         |    |      |       |       |        |        | 550   | 481   | 69     | 73   |        |       |       | 7 9 0        |
| 38 | 4 | 10 | 3    | 43   | $2,3_5$ | 74 | 25,4 | 5,514 | 1,294 | 26,575 | 532,96 | -0,33 | -0,17 | -0,160 | 22,4 | 10,401 | 0,194 | 11,30 | 0,00820,0660 |
|    |   |    |      |      |         |    |      |       |       |        |        | 482   | 454   | 28     | 19   |        |       |       | 2 8 0        |
| 39 | 4 | 11 | 3,13 | 41,2 | $2,3_1$ | 76 | 26,2 | 5,883 | 1,285 | 27,961 | 561,02 | -0,32 | -0,17 | -0,151 | 25,7 | 11,008 | 0,189 | 11,94 | 0,03163,9570 |
|    |   |    |      |      |         |    |      |       |       |        |        | 570   | 379   | 91     | 20   |        |       |       | 1 6 0        |
| 40 | 4 | 12 | 3,22 | 39,2 | $2,2_7$ | 78 | 26,9 | 6,243 | 1,277 | 29,348 | 589,08 | -0,31 | -0,17 | -0,144 | 29,9 | 11,545 | 0,185 | 12,58 | 0,06060,9400 |
|    |   |    |      |      |         |    |      |       |       |        |        | 806   | 375   | 31     | 09   |        |       |       | 4 2 0        |
| 41 | 4 | 14 | 3,4  | 35,2 | $2,1_9$ | 82 | 28   | 6,94  | 1,26  | 32,12  | 645,2  | -0,30 | -0,17 | -0,131 | 37,9 | 12,669 | 0,176 | 13,87 | 0,02790,2230 |
|    |   |    |      |      |         |    |      |       |       |        |        | 562   | 364   | 98     | 30   |        |       |       | 9 3 0        |
| 42 | 4 | 16 | 3,58 | 31,5 | $2,1_1$ | 86 | 29,3 | 7,61  | 1,246 | 34,893 | 701,32 | -0,29 | -0,17 | -0,122 | 46,2 | 13,792 | 0,169 | 15,18 | 0,051812,952 |
|    |   |    |      |      |         |    |      |       |       |        |        | 602   | 361   | 41     | 51   |        |       |       | 3 1 00       |
| 43 | 5 | 1  | 2,25 | 58,5 | $2,6_8$ | 58 | 21,2 | 0,967 | 1,309 | 14,792 | 294,45 | -0,35 | -0,17 | -0,176 | 1,24 | 6,108  | 0,26  | 6,39  | 27,37427,375 |
|    |   |    |      |      |         |    |      |       |       |        |        | 499   | 874   | 25     | 8    |        |       |       | 84 00        |
| 44 | 5 | 2  | 2,33 | 56,6 | $2,6_4$ | 60 | 21,7 | 1,46  | 1,322 | 16,178 | 322,51 | -0,35 | -0,17 | -0,178 | 0,55 | 6,604  | 0,249 | 6,885 | 25,42225,423 |
|    |   |    |      |      |         |    |      |       |       |        |        | 210   | 344   | 66     | 3    |        |       |       | 52 00        |
| 45 | 5 | 3  | 2,41 | 55,7 | $2,6$   | 62 | 22,2 | 1,929 | 1,326 | 17,564 | 350,57 | -0,35 | -0,17 | -0,179 | 0,61 | 7,159  | 0,239 | 7,42  | 5,932523,730 |
|    |   |    |      |      |         |    |      |       |       |        |        | 085   | 131   | 54     | 1    |        |       |       | 4 00         |
| 46 | 5 | 4  | 2,49 | 53,9 | $2,5_6$ | 64 | 22,7 | 2,38  | 1,325 | 18,951 | 378,63 | -0,35 | -0,17 | -0,179 | 1,12 | 7,748  | 0,23  | 7,983 | 0,177911,125 |
|    |   |    |      |      |         |    |      |       |       |        |        | 017   | 022   | 95     | 0    |        |       |       | 9 00         |

|    |   |    |      |      |            |    |      |       |       |        |        |       |       |        |      |    |        |       |       |                |          |    |
|----|---|----|------|------|------------|----|------|-------|-------|--------|--------|-------|-------|--------|------|----|--------|-------|-------|----------------|----------|----|
| 47 | 5 | 5  | 2,58 | 52,1 | $2,5$<br>2 | 66 | 23,2 | 2,814 | 1,321 | 20,337 | 406,69 | -0,34 | -0,16 | -0,180 | 2,18 | 4  | 8,358  | 0,222 | 8,567 | $2,617$<br>4   | 720,942  | 00 |
| 48 | 5 | 6  | 2,67 | 50,1 | $2,4$<br>8 | 68 | 23,7 | 3,232 | 1,315 | 21,723 | 434,75 | -0,34 | -0,16 | -0,180 | 2,51 | 0  | 8,996  | 0,215 | 9,166 | $0,158$<br>4   | 22,4720  | 0  |
| 49 | 5 | 7  | 2,75 | 47,8 | $2,4$<br>4 | 70 | 24,2 | 3,638 | 1,307 | 23,109 | 462,81 | -0,34 | -0,16 | -0,180 | 3,48 | 7  | 9,629  | 0,208 | 9,777 | $0,018$<br>4   | 718,740  | 00 |
| 50 | 5 | 8  | 2,83 | 45,6 | 2,4        | 72 | 24,8 | 4,944 | 1,299 | 24,496 | 490,87 | -0,34 | -0,16 | -0,180 | 4,04 | 0  | 10,294 | 0,202 | 10,39 | $0,142$<br>7   | 42,2260  | 0  |
| 51 | 5 | 9  | 2,91 | 44   | $2,3$<br>6 | 74 | 25,3 | 5,327 | 1,291 | 25,882 | 518,93 | -0,34 | -0,16 | -0,174 | 4,92 | 2  | 10,96  | 0,197 | 11,02 | $0,008$<br>4   | 40,1360  | 0  |
| 52 | 5 | 10 | 3,07 | 41,9 | $2,3$<br>2 | 76 | 25,9 | 5,7   | 1,283 | 27,268 | 546,99 | -0,33 | -0,16 | -0,164 | 5,56 | 3  | 11,647 | 0,192 | 11,65 | $0,004$<br>7   | 00,0650  | 0  |
| 53 | 5 | 11 | 3,16 | 40,1 | $2,2$<br>8 | 78 | 26,5 | 6,064 | 1,275 | 28,655 | 575,05 | -0,32 | -0,16 | -0,155 | 6,61 | 2  | 12,318 | 0,187 | 12,29 | $0,015$<br>5   | 40,2480  | 0  |
| 54 | 5 | 12 | 3,25 | 38,1 | $2,2$<br>4 | 80 | 27,1 | 6,42  | 1,267 | 30,041 | 603,11 | -0,31 | -0,16 | -0,147 | 6,93 | 2  | 13,109 | 0,182 | 12,93 | $0,029$<br>7   | 60,4600  | 0  |
| 55 | 5 | 14 | 3,43 | 33,9 | $2,1$<br>6 | 84 | 28,3 | 7,11  | 1,252 | 32,813 | 659,23 | -0,30 | -0,17 | -0,133 | 26,6 | 69 | 13,391 | 0,175 | 14,22 | $0,027$<br>9   | 40,8490  | 0  |
| 56 | 5 | 16 | 3,61 | 29,6 | $2,0$<br>8 | 88 | 29,6 | 7,773 | 1,239 | 35,586 | 715,35 | -0,29 | -0,17 | -0,124 | 32,8 | 78 | 14,639 | 0,168 | 15,53 | $0,203$<br>1   | 512,721  | 00 |
| 57 | 6 | 1  | 2,29 | 47,1 | $2,7$<br>3 | 56 | 29,3 | 1,216 | 1,288 | 15,485 | 308,48 | -0,34 | -0,17 | -0,173 | 1,77 | 9  | 6,552  | 0,254 | 6,758 | $6,590$<br>5   | 626,363  | 00 |
| 58 | 6 | 2  | 2,37 | 44,8 | $2,6$<br>6 | 59 | 30,2 | 1,697 | 1,301 | 16,871 | 336,54 | -0,34 | -0,16 | -0,175 | 0,22 | 5  | 6,977  | 0,243 | 7,254 | $0,761$<br>7   | 626,360  | 00 |
| 59 | 6 | 3  | 2,45 | 42,6 | $2,5$<br>9 | 62 | 30,9 | 2,157 | 1,306 | 18,257 | 364,6  | -0,34 | -0,16 | -0,178 | 1,61 | 3  | 7,477  | 0,234 | 7,788 | $0,711$<br>4   | 922,966  | 00 |
| 60 | 6 | 4  | 2,54 | 39,4 | $2,5$<br>3 | 65 | 31,5 | 2,599 | 1,306 | 19,644 | 392,66 | -0,34 | -0,16 | -0,179 | 4,33 | 8  | 7,912  | 0,226 | 8,349 | $0,668$<br>5   | 882,6970 | 0  |
| 61 | 6 | 5  | 2,62 | 37,6 | $2,4$<br>7 | 68 | 32,1 | 3,025 | 1,304 | 21,03  | 420,72 | -0,34 | -0,16 | -0,179 | 7,16 | 5  | 8,42   | 0,218 | 8,931 | $0,040$<br>9   | 65,0860  | 0  |
| 62 | 6 | 6  | 2,71 | 36,3 | $2,4$<br>1 | 71 | 32,6 | 3,437 | 1,299 | 22,416 | 448,78 | -0,34 | -0,16 | -0,179 | 10,6 | 54 | 8,883  | 0,211 | 9,528 | $0,076$<br>8   | 91,1930  | 0  |
| 63 | 6 | 7  | 2,79 | 35,1 | $2,3$<br>4 | 74 | 33,1 | 3,836 | 1,293 | 23,803 | 476,84 | -0,34 | -0,16 | -0,179 | 14,0 | 68 | 9,407  | 0,205 | 10,13 | $0,018$<br>7   | 20,5660  | 0  |
| 64 | 6 | 8  | 2,87 | 34,2 | $2,2$<br>8 | 77 | 33,6 | 5,136 | 1,286 | 25,189 | 504,9  | -0,34 | -0,16 | -0,179 | 17,9 | 54 | 9,899  | 0,199 | 10,75 | $0,008$<br>6   | 61,0770  | 0  |
| 65 | 6 | 9  | 2,95 | 33,3 | $2,2$<br>2 | 80 | 34   | 5,514 | 1,279 | 26,575 | 532,96 | -0,34 | -0,16 | -0,179 | 21,7 | 59 | 10,429 | 0,194 | 11,38 | $0,016$<br>1   | 50,0330  | 0  |
| 66 | 6 | 10 | 3,07 | 32,2 | $2,1$<br>5 | 83 | 34,4 | 5,883 | 1,272 | 27,961 | 561,02 | -0,33 | -0,16 | -0,171 | 25,9 | 38 | 10,928 | 0,189 | 12,01 | $0,003$<br>3   | 90,0160  | 0  |
| 67 | 6 | 11 | 3,2  | 31,2 | $2,0$<br>9 | 86 | 34,8 | 6,243 | 1,265 | 29,348 | 589,08 | -0,32 | -0,16 | -0,162 | 29,9 | 95 | 11,466 | 0,185 | 12,64 | $0,015$<br>9   | 10,4700  | 0  |
| 68 | 6 | 12 | 3,29 | 30,3 | $2,0$<br>3 | 89 | 35,2 | 6,595 | 1,258 | 30,734 | 617,14 | -0,31 | -0,16 | -0,154 | 34,4 | 13 | 11,97  | 0,18  | 13,29 | $0,029$<br>7   | 90,6340  | 0  |
| 69 | 6 | 14 | 3,47 | 28,3 | 1,9        | 95 | 36,1 | 7,278 | 1,245 | 33,507 | 673,26 | -0,30 | -0,16 | -0,142 | 43,2 | 06 | 13,017 | 0,173 | 14,58 | $0,026$<br>8   | 80,4170  | 0  |
| 70 | 6 | 16 | 3,65 | 26,4 | $1,7$<br>7 | 10 | 37,1 | 7,935 | 1,233 | 36,279 | 729,38 | -0,29 | -0,16 | -0,133 | 52,2 | 43 | 14,071 | 0,166 | 15,87 | $0,099$<br>9   | 91,5620  | 0  |
| 71 | 7 | 1  | 2,27 | 50,3 | $2,6$<br>1 | 60 | 27,2 | 1,46  | 1,269 | 16,178 | 322,51 | -0,34 | -0,17 | -0,171 | 2,96 | 7  | 6,942  | 0,249 | 7,123 | $12,711$<br>26 | 133,874  | 76 |
| 72 | 7 | 2  | 2,38 | 48,5 | $2,5$<br>8 | 62 | 28,1 | 1,929 | 1,282 | 17,564 | 350,57 | -0,34 | -0,16 | -0,175 | 1,26 | 7  | 7,334  | 0,239 | 7,62  | $0,735$<br>3   | 628,467  | 97 |
| 73 | 7 | 3  | 2,48 | 46,7 | $2,5$<br>5 | 64 | 29,1 | 2,38  | 1,288 | 18,951 | 378,63 | -0,33 | -0,16 | -0,175 | 0,08 | 4  | 8,007  | 0,23  | 8,154 | $0,355$<br>8   | 913,181  | 31 |

|     |   |    |      |      |                 |    |      |       |       |        |        |       |       |        |      |        |       |       |        |        |
|-----|---|----|------|------|-----------------|----|------|-------|-------|--------|--------|-------|-------|--------|------|--------|-------|-------|--------|--------|
| 74  | 7 | 4  | 2,57 | 44,9 | $\frac{2,5}{2}$ | 66 | 30,2 | 2,814 | 1,29  | 20,337 | 406,69 | -0,33 | -0,16 | -0,175 | 0,46 | 8,594  | 0,222 | 8,714 | 0,0837 | 26,359 |
| 75  | 7 | 5  | 2,68 | 43,1 | $\frac{2,4}{9}$ | 68 | 31,2 | 3,232 | 1,288 | 21,723 | 434,75 | -0,33 | -0,16 | -0,176 | 1,51 | 9,202  | 0,215 | 9,295 | 0,0395 | 2,8707 |
| 76  | 7 | 6  | 2,78 | 41,3 | $\frac{2,4}{6}$ | 70 | 32,3 | 3,638 | 1,285 | 23,109 | 462,81 | -0,33 | -0,16 | -0,176 | 1,88 | 9,836  | 0,208 | 9,89  | 0,0046 | 1,3376 |
| 77  | 7 | 7  | 2,89 | 39,5 | $\frac{2,4}{3}$ | 72 | 33,2 | 4,032 | 1,28  | 24,496 | 490,87 | -0,33 | -0,16 | -0,175 | 2,91 | 10,448 | 0,202 | 10,49 | 0,0089 | 0,3255 |
| 78  | 7 | 8  | 2,99 | 37,7 | $\frac{2,4}{4}$ | 74 | 34,3 | 5,327 | 1,274 | 25,882 | 518,93 | -0,33 | -0,16 | -0,175 | 3,56 | 11,101 | 0,197 | 11,11 | 0,0021 | 0,3079 |
| 79  | 7 | 9  | 3,09 | 35,9 | $\frac{2,3}{7}$ | 76 | 35,4 | 5,7   | 1,268 | 27,268 | 546,99 | -0,33 | -0,16 | -0,176 | 4,42 | 11,781 | 0,192 | 11,73 | 0,0020 | 0,2921 |
| 80  | 7 | 10 | 3,19 | 33,1 | $\frac{2,3}{4}$ | 78 | 36,3 | 6,064 | 1,262 | 28,655 | 575,05 | -0,33 | -0,16 | -0,168 | 4,88 | 12,455 | 0,187 | 12,36 | 0,0019 | 0,0694 |
| 81  | 7 | 11 | 3,29 | 31,3 | $\frac{2,3}{1}$ | 80 | 37,3 | 6,42  | 1,256 | 30,041 | 603,11 | -0,32 | -0,16 | -0,160 | 26,8 | 12,034 | 0,182 | 13,00 | 0,0037 | 0,2650 |
| 82  | 7 | 12 | 3,4  | 29,6 | $\frac{2,2}{6}$ | 82 | 38,2 | 6,769 | 1,25  | 31,427 | 631,17 | -0,31 | -0,16 | -0,152 | 30,5 | 12,572 | 0,178 | 13,64 | 0,0071 | 0,4906 |
| 83  | 7 | 14 | 3,51 | 27,8 | $\frac{2,1}{9}$ | 86 | 40,3 | 7,445 | 1,238 | 34,2   | 687,29 | -0,30 | -0,16 | -0,140 | 38,9 | 13,525 | 0,171 | 14,93 | 0,0066 | 0,9012 |
| 84  | 7 | 16 | 3,62 | 26,1 | $\frac{2,1}{1}$ | 90 | 42,2 | 8,096 | 1,227 | 36,972 | 743,41 | -0,29 | -0,16 | -0,131 | 46,7 | 14,629 | 0,164 | 16,22 | 0,0122 | 1,6800 |
| 85  | 8 | 1  | 2,25 | 56,2 | $\frac{2,5}{1}$ | 63 | 19,8 | 1,697 | 1,253 | 16,871 | 336,54 | -0,33 | -0,16 | -0,171 | 1,27 | 7,43   | 0,243 | 7,486 | 0,2108 | 1,8384 |
| 86  | 8 | 2  | 2,36 | 54,1 | $\frac{2,4}{7}$ | 65 | 20,7 | 2,157 | 1,266 | 18,257 | 364,6  | -0,33 | -0,16 | -0,174 | 0,15 | 7,806  | 0,234 | 7,985 | 0,1837 | 3,4218 |
| 87  | 8 | 3  | 2,45 | 52,1 | $\frac{2,4}{4}$ | 67 | 21,5 | 2,599 | 1,272 | 19,644 | 392,66 | -0,33 | -0,16 | -0,174 | 1,27 | 8,25   | 0,226 | 8,519 | 0,0053 | 1,5762 |
| 88  | 8 | 4  | 2,49 | 50,2 | $\frac{2,4}{1}$ | 69 | 22,3 | 3,025 | 1,275 | 21,03  | 420,72 | -0,33 | -0,16 | -0,174 | 3,29 | 8,626  | 0,218 | 9,078 | 0,3255 | 5,9325 |
| 89  | 8 | 5  | 2,55 | 48,3 | $\frac{2,3}{7}$ | 71 | 23,1 | 3,437 | 1,274 | 22,416 | 448,78 | -0,33 | -0,16 | -0,174 | 4,86 | 9,244  | 0,211 | 9,657 | 0,0769 | 2,7811 |
| 90  | 8 | 6  | 2,64 | 46,3 | $\frac{2,3}{5}$ | 73 | 23,9 | 3,836 | 1,272 | 23,803 | 476,84 | -0,33 | -0,16 | -0,175 | 7,50 | 9,743  | 0,205 | 10,25 | 0,0365 | 0,3350 |
| 91  | 8 | 7  | 2,71 | 44,2 | $\frac{2,3}{3}$ | 75 | 24,8 | 4,224 | 1,268 | 25,189 | 504,9  | -0,33 | -0,16 | -0,175 | 10,1 | 10,276 | 0,199 | 10,85 | 0,0086 | 0,3164 |
| 92  | 8 | 8  | 2,9  | 42,1 | $\frac{2,3}{1}$ | 77 | 25,6 | 5,514 | 1,263 | 26,575 | 532,96 | -0,33 | -0,15 | -0,175 | 13,3 | 10,85  | 0,194 | 11,47 | 0,0020 | 0,2998 |
| 93  | 8 | 9  | 2,98 | 39,7 | $\frac{2,2}{8}$ | 79 | 26,8 | 5,883 | 1,258 | 27,961 | 561,02 | -0,33 | -0,15 | -0,175 | 16,6 | 11,397 | 0,189 | 12,09 | 0,0039 | 0,5519 |
| 94  | 8 | 10 | 3,08 | 37,6 | $\frac{2,2}{5}$ | 81 | 27,3 | 6,243 | 1,253 | 29,348 | 589,08 | -0,33 | -0,15 | -0,170 | 20,0 | 11,935 | 0,185 | 12,72 | 0,0037 | 0,0339 |
| 95  | 8 | 11 | 3,17 | 35,4 | $\frac{2,2}{2}$ | 83 | 27,9 | 6,595 | 1,247 | 30,734 | 617,14 | -0,32 | -0,15 | -0,161 | 23,4 | 12,496 | 0,18  | 13,35 | 0,0145 | 0,1295 |
| 96  | 8 | 12 | 3,28 | 33,1 | $\frac{2,1}{9}$ | 85 | 29,1 | 6,94  | 1,242 | 32,12  | 645,2  | -0,31 | -0,15 | -0,154 | 27,0 | 13,059 | 0,176 | 13,99 | 0,0139 | 1,9354 |
| 97  | 8 | 14 | 3,45 | 29,1 | $\frac{2,1}{2}$ | 89 | 30,8 | 7,61  | 1,231 | 34,893 | 701,32 | -0,30 | -0,15 | -0,142 | 34,7 | 14,162 | 0,169 | 15,28 | 0,0129 | 3,5615 |
| 98  | 8 | 16 | 3,69 | 25,4 | $\frac{2,0}{4}$ | 93 | 32,5 | 8,255 | 1,221 | 37,666 | 757,44 | -0,29 | -0,15 | -0,133 | 42,9 | 15,248 | 0,163 | 16,57 | 0,0483 | 1,6489 |
| 99  | 9 | 1  | 2,21 | 50,1 | $\frac{2,4}{4}$ | 67 | 28,6 | 1,929 | 1,239 | 17,564 | 350,57 | -0,33 | -0,16 | -0,173 | 1,56 | 7,839  | 0,239 | 7,847 | 0,3796 | 2,467  |
| 100 | 9 | 2  | 2,27 | 49,1 | $\frac{2,4}{1}$ | 69 | 28,9 | 2,38  | 1,251 | 18,951 | 378,63 | -0,33 | -0,16 | -0,172 | 1,89 | 8,291  | 0,23  | 8,348 | 0,0890 | 2,362  |

|     |    |    |      |      |                 |    |      |       |       |        |        |       |       |        |      |        |       |       |              |
|-----|----|----|------|------|-----------------|----|------|-------|-------|--------|--------|-------|-------|--------|------|--------|-------|-------|--------------|
| 101 | 9  | 3  | 2,33 | 48,2 | $\frac{2,3}{7}$ | 71 | 29,3 | 2,814 | 1,258 | 20,337 | 406,69 | -0,33 | -0,15 | -0,173 | 0,70 | 8,847  | 0,222 | 8,882 | 0,083726,359 |
| 102 | 9  | 4  | 2,39 | 47,1 | $\frac{2,3}{4}$ | 73 | 29,6 | 3,232 | 1,261 | 21,723 | 434,75 | -0,33 | -0,15 | -0,173 | 0,12 | 9,434  | 0,215 | 9,441 | 0,01972,8707 |
| 103 | 9  | 5  | 2,45 | 46,1 | $\frac{2,3}{1}$ | 75 | 29,9 | 3,638 | 1,261 | 23,109 | 462,81 | -0,33 | -0,15 | -0,173 | 0,90 | 10,04  | 0,208 | 10,01 | 0,00931,3376 |
| 104 | 9  | 6  | 2,51 | 45,1 | $\frac{2,2}{9}$ | 77 | 31,3 | 4,032 | 1,26  | 24,496 | 490,87 | -0,33 | -0,15 | -0,173 | 1,31 | 10,671 | 0,202 | 10,61 | 0,08900,6306 |
| 105 | 9  | 7  | 2,56 | 44   | $\frac{2,2}{7}$ | 79 | 31,6 | 4,415 | 1,257 | 25,882 | 518,93 | -0,33 | -0,15 | -0,173 | 2,30 | 11,267 | 0,197 | 11,21 | 0,00421,1932 |
| 106 | 9  | 8  | 2,61 | 42,9 | $\frac{2,2}{4}$ | 81 | 31,9 | 5,7   | 1,253 | 27,268 | 546,99 | -0,33 | -0,15 | -0,173 | 2,57 | 11,935 | 0,192 | 11,83 | 0,00800,5660 |
| 107 | 9  | 9  | 2,66 | 41,8 | $\frac{2,2}{1}$ | 83 | 32,3 | 6,064 | 1,249 | 28,655 | 575,05 | -0,33 | -0,15 | -0,173 | 3,59 | 12,589 | 0,187 | 12,45 | 0,01541,0769 |
| 108 | 9  | 10 | 2,72 | 40,6 | $\frac{2,1}{8}$ | 85 | 32,7 | 6,42  | 1,244 | 30,041 | 603,11 | -0,32 | -0,15 | -0,171 | 5,17 | 13,232 | 0,182 | 13,07 | 0,02960,2650 |
| 109 | 9  | 11 | 2,78 | 39,5 | $\frac{2,1}{5}$ | 87 | 33,1 | 6,769 | 1,239 | 31,427 | 631,17 | -0,32 | -0,15 | -0,163 | 24,4 | 12,782 | 0,178 | 13,71 | 0,01420,9813 |
| 110 | 9  | 12 | 2,84 | 38,4 | $\frac{2,1}{1}$ | 89 | 33,5 | 7,11  | 1,234 | 32,813 | 659,23 | -0,31 | -0,15 | -0,156 | 27,6 | 13,315 | 0,175 | 14,34 | 0,05481,8943 |
| 111 | 9  | 14 | 2,98 | 36,2 | $\frac{2,0}{2}$ | 93 | 34,4 | 7,773 | 1,225 | 35,586 | 715,35 | -0,30 | -0,15 | -0,144 | 34,9 | 14,398 | 0,168 | 15,63 | 0,05081,7459 |
| 112 | 9  | 16 | 3,11 | 34,1 | $\frac{1,9}{2}$ | 97 | 35,1 | 8,413 | 1,215 | 38,359 | 771,47 | -0,29 | -0,15 | -0,135 | 37,4 | 15,959 | 0,161 | 16,92 | 0,02370,2072 |
| 113 | 10 | 1  | 2,18 | 44,1 | $\frac{2,3}{7}$ | 73 | 31,4 | 2,157 | 1,226 | 18,257 | 364,6  | -0,33 | -0,16 | -0,172 | 0,99 | 8,28   | 0,234 | 8,206 | 0,183727,374 |
| 114 | 10 | 2  | 2,23 | 43,2 | $\frac{2,3}{5}$ | 74 | 31,6 | 2,599 | 1,238 | 19,644 | 392,66 | -0,33 | -0,15 | -0,176 | 0,41 | 8,75   | 0,226 | 8,709 | 0,172625,422 |
| 115 | 10 | 3  | 2,29 | 42,2 | $\frac{2,3}{3}$ | 75 | 31,8 | 3,025 | 1,245 | 21,03  | 420,72 | -0,33 | -0,15 | -0,172 | 0,69 | 9,055  | 0,218 | 9,244 | 0,081311,865 |
| 116 | 10 | 4  | 2,33 | 41,2 | $\frac{2,3}{1}$ | 76 | 32   | 3,437 | 1,249 | 22,416 | 448,78 | -0,32 | -0,15 | -0,172 | 2,33 | 9,546  | 0,211 | 9,802 | 0,038422,249 |
| 117 | 10 | 5  | 2,4  | 40,3 | $\frac{2,2}{9}$ | 77 | 32,2 | 3,836 | 1,25  | 23,803 | 476,84 | -0,32 | -0,15 | -0,173 | 4,40 | 10,055 | 0,205 | 10,38 | 0,00050,6492 |
| 118 | 10 | 6  | 2,46 | 39,2 | $\frac{2,2}{7}$ | 78 | 32,4 | 4,224 | 1,249 | 25,189 | 504,9  | -0,32 | -0,15 | -0,173 | 6,72 | 10,586 | 0,199 | 10,97 | 0,00100,6131 |
| 119 | 10 | 7  | 2,51 | 38,4 | $\frac{2,2}{5}$ | 79 | 32,6 | 4,602 | 1,247 | 26,575 | 532,96 | -0,32 | -0,15 | -0,173 | 9,44 | 11,082 | 0,194 | 11,57 | 0,00410,5809 |
| 120 | 10 | 8  | 2,56 | 37,5 | $\frac{2,2}{3}$ | 80 | 32,8 | 5,883 | 1,244 | 27,961 | 561,02 | -0,32 | -0,15 | -0,173 | 12,4 | 11,6   | 0,189 | 12,18 | 0,01580,5519 |
| 121 | 10 | 9  | 2,61 | 36,5 | $\frac{2,2}{1}$ | 81 | 33   | 6,243 | 1,24  | 29,348 | 589,08 | -0,32 | -0,15 | -0,174 | 14,6 | 12,497 | 0,185 | 12,80 | 0,00751,0513 |
| 122 | 10 | 10 | 2,66 | 35,6 | $\frac{2,1}{9}$ | 82 | 33,2 | 6,595 | 1,236 | 30,734 | 617,14 | -0,32 | -0,15 | -0,173 | 17,7 | 13,046 | 0,18  | 13,43 | 0,02900,2589 |
| 123 | 10 | 11 | 2,72 | 34,6 | $\frac{2,1}{7}$ | 83 | 33,4 | 6,94  | 1,232 | 32,12  | 645,2  | -0,31 | -0,15 | -0,165 | 19,1 | 13,736 | 0,176 | 14,06 | 0,02790,9600 |
| 124 | 10 | 12 | 2,78 | 33,5 | $\frac{2,1}{5}$ | 84 | 33,6 | 7,278 | 1,227 | 33,507 | 673,26 | -0,31 | -0,15 | -0,157 | 22,4 | 14,296 | 0,173 | 14,7  | 0,02687,4196 |
| 125 | 10 | 14 | 2,91 | 31,4 | $\frac{2,1}{1}$ | 86 | 34,1 | 7,935 | 1,219 | 36,279 | 729,38 | -0,30 | -0,15 | -0,145 | 28,6 | 15,453 | 0,166 | 15,98 | 0,02501,7123 |
| 126 | 10 | 16 | 3,04 | 29,3 | $\frac{2,0}{7}$ | 88 | 34,6 | 8,57  | 1,21  | 39,052 | 785,5  | -0,29 | -0,15 | -0,136 | 35,1 | 16,618 | 0,16  | 17,27 | 0,02336,3605 |
| 127 | 12 | 1  | 2,29 | 43,6 | $\frac{2,2}{3}$ | 76 | 31,9 | 2,599 | 1,205 | 19,644 | 392,66 | -0,33 | -0,15 | -0,171 | 0,85 | 9,103  | 0,226 | 8,921 | 0,043126,362 |

|     |    |    |      |      |         |    |      |       |       |        |        |       |       |        |      |        |       |       |       |          |
|-----|----|----|------|------|---------|----|------|-------|-------|--------|--------|-------|-------|--------|------|--------|-------|-------|-------|----------|
| 128 | 12 | 2  | 2,34 | 42,5 | $2,2_1$ | 77 | 32,1 | 3,025 | 1,216 | 21,03  | 420,72 | -0,33 | -0,15 | -0,184 | 0,38 | 9,566  | 0,218 | 9,428 | 0,081 | 326,359  |
| 129 | 12 | 3  | 2,4  | 41,7 | $2,1_9$ | 78 | 32,3 | 3,437 | 1,223 | 22,416 | 448,78 | -0,32 | -0,15 | -0,174 | 1,11 | 10,077 | 0,211 | 9,964 | 0,019 | 25,7414  |
| 130 | 12 | 4  | 2,46 | 41,4 | $2,1_7$ | 79 | 32,5 | 3,836 | 1,227 | 23,803 | 476,84 | -0,32 | -0,15 | -0,174 | 2,04 | 10,627 | 0,205 | 10,52 | 0,009 | 12,6969  |
| 131 | 12 | 5  | 2,51 | 39,9 | $2,1_5$ | 80 | 32,7 | 4,224 | 1,229 | 25,189 | 504,9  | -0,32 | -0,15 | -0,174 | 3,51 | 11,187 | 0,199 | 11,09 | 0,001 | 102,5430 |
| 132 | 12 | 6  | 2,56 | 39,1 | $2,1_3$ | 81 | 32,9 | 4,602 | 1,229 | 26,575 | 532,96 | -0,32 | -0,15 | -0,174 | 5,38 | 11,726 | 0,194 | 11,68 | 0,008 | 21,1932  |
| 133 | 12 | 7  | 2,62 | 38,1 | $2,1_1$ | 82 | 33,1 | 4,971 | 1,228 | 27,961 | 561,02 | -0,32 | -0,15 | -0,174 | 7,25 | 12,3   | 0,189 | 12,29 | 0,000 | 50,5660  |
| 134 | 12 | 8  | 2,67 | 37,2 | $2,0_9$ | 83 | 33,3 | 6,243 | 1,226 | 29,348 | 589,08 | -0,32 | -0,15 | -0,173 | 9,51 | 12,852 | 0,185 | 12,9  | 0,015 | 10,2779  |
| 135 | 12 | 9  | 2,73 | 36,2 | $2,0_7$ | 84 | 33,5 | 6,595 | 1,224 | 30,734 | 617,14 | -0,32 | -0,15 | -0,173 | 11,7 | 13,435 | 0,18  | 13,51 | 0,003 | 64,1407  |
| 136 | 12 | 10 | 2,78 | 35,5 | $2,0_5$ | 85 | 33,7 | 6,94  | 1,221 | 32,12  | 645,2  | -0,32 | -0,15 | -0,173 | 15,3 | 13,978 | 0,176 | 14,14 | 0,013 | 91,9784  |
| 137 | 12 | 11 | 2,85 | 34,5 | $2,0_3$ | 86 | 33,9 | 7,278 | 1,218 | 33,507 | 673,26 | -0,31 | -0,15 | -0,167 | 17,9 | 14,565 | 0,173 | 14,77 | 0,053 | 73,7887  |
| 138 | 12 | 12 | 2,89 | 33,9 | $2,0_1$ | 87 | 34,1 | 7,61  | 1,214 | 34,893 | 701,32 | -0,31 | -0,15 | -0,159 | 21,0 | 15,137 | 0,169 | 15,40 | 0,051 | 814,536  |
| 139 | 12 | 14 | 3,01 | 32,4 | $1,9_7$ | 89 | 34,5 | 8,255 | 1,207 | 37,666 | 757,44 | -0,29 | -0,15 | -0,148 | 27,3 | 16,286 | 0,163 | 16,68 | 0,048 | 36,7202  |
| 140 | 12 | 16 | 3,12 | 30,9 | $1,9_3$ | 91 | 34,9 | 8,88  | 1,2   | 40,438 | 813,56 | -0,29 | -0,15 | -0,139 | 33,6 | 17,445 | 0,157 | 17,97 | 0,090 | 46,2490  |
